# Supplementary material
Source: Springer Nature journal article supplement (https://www.springermedizin.de/resource/supplementary/12913_2011_2066_MOESM1_ESM.pdf/9529824)

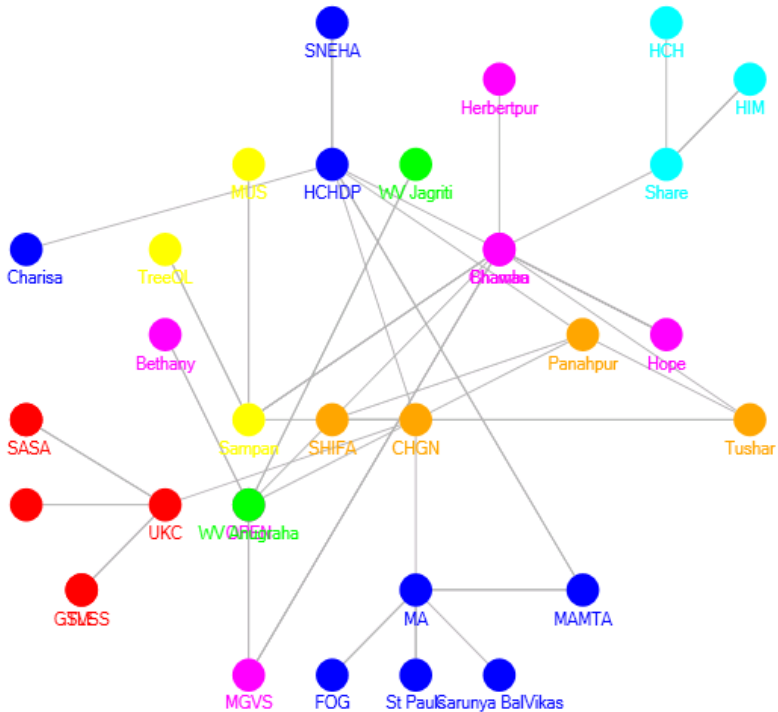

Supplement: MOESM1 [file 9529824]
